# Supplementary material for: Adopting a Mediterranean-Style Eating Pattern with Different Amounts of Lean Unprocessed Red Meat Does Not Influence Short-Term Subjective Personal Well-Being in Adults with Overweight or Obesity
Source: PubMed Central journal article supplement — J Nutr. 2018 Dec 5;148(12):1917–23. doi: 10.1093/jn/nxy235 (PMC7263834; doi:10.1093/jn/nxy235), 2018-12-05
Supplement: nxy235_supplemental_tables.pdf [file nxy235_supplemental_tables.pdf]

1 **Supplementary data**2 **Supplemental Table 1:** Prescribed daily dietary intakes<sup>1</sup> of the Mediterranean-style eating pattern menus

|                           | <b>Med-Red Pattern</b> | <b>Med-Control Pattern</b> |
|---------------------------|------------------------|----------------------------|
| Energy (kcal)             | 2600 ± 428             | 2570 ± 405 <sup>†</sup>    |
| Protein (%en)             | 18 ± 0                 | 19 ± 1 <sup>†</sup>        |
| Carbohydrate (%en)        | 42 ± 1                 | 42 ± 2                     |
| Fat (%en)                 | 40 ± 1                 | 40 ± 1                     |
| Monounsaturated fat (%en) | 22 ± 1                 | 21 ± 1 <sup>†</sup>        |
| Polyunsaturated fat (%en) | 8 ± 0                  | 9 ± 1 <sup>†</sup>         |
| Saturated fat (%en)       | 7 ± 0                  | 8 ± 0 <sup>†</sup>         |
| Sodium (mg)               | 2640 ± 354             | 2600 ± 317                 |
| Potassium (mg)            | 4860 ± 624             | 4330 ± 653 <sup>†</sup>    |
| Magnesium (mg)            | 490 ± 96               | 483 ± 74                   |

Results are presented as unadjusted means ± SD (n=41); <sup>1</sup>averaged across 7-day menu cycle; %en= % of total energy; <sup>†</sup>denotes a difference between Med-Red and Med-Control indicated by a paired t-test,  $P < 0.05$ . This material was reproduced from [19] with permission of Oxford University Press.

3 **Supplementary data**4 **Supplemental Table 2:** Prescribed daily and weekly food group servings for the median energy intake level<sup>1</sup>

|                                                           | <b>Med-Red Pattern</b> | <b>Med-Control Pattern</b> |
|-----------------------------------------------------------|------------------------|----------------------------|
| Fruits per day (servings <sup>2</sup> )                   | 4                      | 4                          |
| Vegetables per day (servings <sup>3</sup> )               | 7                      | 8                          |
| Dark green vegetables                                     | 1                      | 2                          |
| Red and orange vegetables                                 | 1                      | 1                          |
| Legumes                                                   | 1                      | 1                          |
| Starchy vegetables                                        | 1                      | 1                          |
| Other vegetables                                          | 3                      | 3                          |
| Grains per day (servings <sup>4</sup> )                   | 4                      | 5                          |
| Whole grains                                              | 4                      | 4                          |
| Refined grains                                            | 0                      | 1                          |
| Protein-rich foods per week (g <sup>5</sup> )             |                        |                            |
| Red meat                                                  | 476                    | 196                        |
| Poultry                                                   | 112                    | 420                        |
| Seafood                                                   | 336                    | 336                        |
| Whole eggs                                                | 2                      | 3                          |
| Nuts, seed, soy <sup>6</sup>                              | 560                    | 616                        |
| Dairy per day (servings <sup>7</sup> )                    | 3                      | 2                          |
| Olive oil per week (g <sup>8</sup> )                      | 247                    | 247                        |
| 14-point Mediterranean Diet<br>Assessment Tool Score (20) | 12                     | 13                         |

<sup>1</sup> Food group servings presented for representative 2492 kcal Med-Red and Med-Control averaged across 7-day menu cycle, <sup>2</sup> ½ cup or 1 medium fresh fruit, <sup>3</sup> ½ cup fresh or 1 cup leafy, <sup>4</sup> 28 g= ½ cup or 1 oz, <sup>5</sup> 28 g= 1 oz; cooked weights, <sup>6</sup> 28 g=1 tbsp. nut butter or 1/2 oz nuts/seeds or ~1 oz-equivalent, <sup>7</sup> 1 cup milk or yogurt, <sup>8</sup> 4.5g= 1 tsp. This material was reproduced from [19] with permission of Oxford University Press.

### Supplementary data

**Supplemental Table 3:** Changes in daily mood states<sup>1</sup> of adults who are overweight or obese after 5 weeks of following a Mediterranean Pattern with different amounts of lean unprocessed red meat

| <b>Mood, au<sup>2</sup></b> | <b>Med-Red Pattern</b> |             |            | <b>Med-Control Pattern</b> |             |            | <b>P value<sup>3</sup></b> |                |
|-----------------------------|------------------------|-------------|------------|----------------------------|-------------|------------|----------------------------|----------------|
|                             | Baseline               | Post        | Change     | Baseline                   | Post        | Change     | Time                       | Time x pattern |
| Tension (0-24)              | 2.2 ± 0.3              | 1.9 ± 0.4   | -0.3 ± 0.2 | 1.8 ± 0.3                  | 1.6 ± 0.3   | -0.2 ± 0.2 | 0.11                       | 0.72           |
| Depression (0-32)           | 1.4 ± 0.3              | 1.3 ± 0.4   | -0.1 ± 0.2 | 1.1 ± 0.3                  | 1.0 ± 0.3   | -0.1 ± 0.2 | 0.30                       | 0.95           |
| Anger (0-28)                | 1.7 ± 0.3              | 1.5 ± 0.3   | -0.2 ± 0.2 | 1.5 ± 0.3                  | 1.2 ± 0.3   | -0.3 ± 0.2 | 0.08                       | 0.51           |
| Vigor (0-24)                | 4.3 ± 0.6              | 4.5 ± 0.5   | 0.2 ± 0.3  | 4.8 ± 0.5                  | 4.8 ± 0.5   | 0.0 ± 0.3  | 0.38                       | 0.56           |
| Fatigue (0-24)              | 3.1 ± 0.3              | 2.5 ± 0.3   | -0.6 ± 0.3 | 2.6 ± 0.3                  | 2.4 ± 0.3   | -0.2 ± 0.3 | 0.039                      | 0.22           |
| Confusion (0-20)            | 1.4 ± 0.3              | 1.3 ± 0.3   | -0.1 ± 0.2 | 1.1 ± 0.3                  | 0.9 ± 0.3   | -0.1 ± 0.2 | 0.14                       | 0.94           |
| Total Mood (100-176)        | 105.3 ± 1.4            | 104.0 ± 1.4 | -1.3 ± 0.9 | 103.2 ± 1.4                | 102.3 ± 1.4 | -0.9 ± 0.9 | 0.07                       | 0.66           |

Results are presented as LS means ± LS mean SEMs,  $n=37$ , significance set at  $P<0.05$ . All values were extracted from a doubly repeated-measures ANOVA adjusted for age, sex, and body mass at each time point. <sup>1</sup>measured by the Profile of Mood States questionnaire, <sup>2</sup>arbitrary units, <sup>3</sup>post hoc pattern-specific effects were analyzed when time x diet  $P$ -interaction  $<0.05$ . Med-Control, Mediterranean-style eating pattern with ~200 g/wk of lean unprocessed red meat; Med-Red, Mediterranean-style eating pattern with ~500 g/wk of lean unprocessed red meat.

## Supplementary data

**Supplemental Table 4:** Changes in perceived sleep of adults who are overweight or obese after 5 weeks of following a Mediterranean Pattern with different amounts of lean unprocessed red meat

| Outcome, au <sup>1</sup> | Med-Red Pattern |           |            | Med-Control Pattern |           |            | P value <sup>2</sup> |                |
|--------------------------|-----------------|-----------|------------|---------------------|-----------|------------|----------------------|----------------|
|                          | Baseline        | Post      | Change     | Baseline            | Post      | Change     | Time                 | Time x pattern |
| Sleep duration           | 0.0 ± 0.1       | 0.0 ± 0.1 | -0.1 ± 0.1 | 0.0 ± 0.1           | 0.0 ± 0.1 | 0.1 ± 0.1  | 0.46                 | 0.23           |
| Sleep disturbances       | 1.3 ± 0.1       | 1.2 ± 0.1 | -0.1 ± 0.1 | 1.3 ± 0.1           | 1.2 ± 0.1 | -0.1 ± 0.1 | 0.06                 | 0.82           |
| Sleep latency            | 0.9 ± 0.1       | 0.8 ± 0.1 | -0.2 ± 0.1 | 0.9 ± 0.1           | 0.9 ± 0.1 | 0.1 ± 0.1  | 0.23                 | 0.24           |
| Daytime dysfunction      | 0.6 ± 0.1       | 0.5 ± 0.1 | -0.1 ± 0.1 | 0.6 ± 0.1           | 0.5 ± 0.1 | -0.1 ± 0.1 | 0.15                 | 0.77           |
| Sleep efficiency         | 0.3 ± 0.1       | 0.3 ± 0.1 | 0.0 ± 0.1  | 0.2 ± 0.1           | 0.3 ± 0.1 | 0.1 ± 0.1  | 0.29                 | 0.72           |
| Perceived sleep quality  | 1.1 ± 0.1       | 0.9 ± 0.1 | -0.3 ± 0.1 | 1.1 ± 0.1           | 0.9 ± 0.1 | -0.2 ± 0.1 | 0.003                | 0.55           |
| Sleeping medication      | 0.4 ± 0.1       | 0.4 ± 0.1 | -0.1 ± 0.1 | 0.4 ± 0.1           | 0.3 ± 0.1 | 0.0 ± 0.1  | 0.34                 | 0.52           |
| Global sleep score       | 5.1 ± 0.4       | 4.3 ± 0.4 | -0.7 ± 0.4 | 4.8 ± 0.4           | 4.6 ± 0.4 | -0.2 ± 0.3 | 0.07                 | 0.16           |

Results are presented as LS means ± LS mean SEMs,  $n=39$ . All values were extracted from a doubly repeated-measures ANOVA adjusted for age, sex, and body mass at each time point. <sup>1</sup>arbitrary units, measured by the Pittsburgh Sleep Quality Index, <sup>2</sup>post hoc pattern-specific effects were analyzed when time x diet  $P$ -interaction  $<0.05$ . No  $P$  values were robust to Benjamini-Hochberg correction for multiple comparisons. Med-Control, Mediterranean-style eating pattern with ~200 g/wk of lean unprocessed red meat; Med-Red, Mediterranean-style eating pattern with ~500 g/wk of lean unprocessed red meat.
